# Supplementary material
Source: PubMed Central journal article supplement (PMC2892955)

**Supplementary Figure 1. MLN8237 does not induce inhibition of cell viability, but does inhibit proliferation, in PBMCs from healthy donors.** Chemical structure of MLN8237 **(A)**. Peripheral blood mononuclear cells from two healthy donors were stimulated with PHA and incubated in the presence of DMSO or increasing doses of MLN8237 (0.1-4 $\mu$ M) for 72 hours. Inhibition of cell proliferation was determined by <sup>3</sup>[H]thymidine incorporation assay **(B)**, and inhibition of cell viability was determined by MTT assay **(C)** in healthy PBMCs. Data represent mean $\pm$ SD of triplicate cultures.

**Supplementary Figure 2. MLN8237 in combination with other anti-MM agents.**

OPM1 cells were treated with MLN8237 (0.125-0.5 $\mu$ M) for 72 hours with conventional anti-MM agents Melphalan (2.5-5 $\mu$ M), Dexamethasone (50-100nM), or Doxorubicin (50-100nM); and with novel anti-MM agents Velcade (2.5-5nM) and Revlimid (0.5-1 $\mu$ M). Velcade was added to the culture for the last 12 hours. **A.** Following treatment, viability was assessed by MTT assay, and data are presented as per cent viability relative to control (mean $\pm$ SD of triplicate cultures). Isobologram analysis using CalcuSyn software indicated that combining MLN8237 with Dexamethasone, Doxorubicin **(B)** or Velcade **(C)** induces synergistic/additive anti-MM activity against MM cell lines in vitro ( $p \leq 0.05$ , combination index, CI < 1)

# Supplementary Figure 1

A

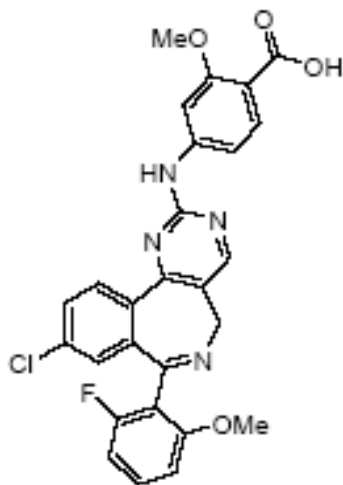

MLN8237, 4-[[9-chloro-7-(2-fluoro-6-methoxyphenyl)-5Hpyrimido[5,4-d][2]benzazepin-2-yl]amino}-2-methoxybenzoic acid.

# Supplementary Figure 1

## B

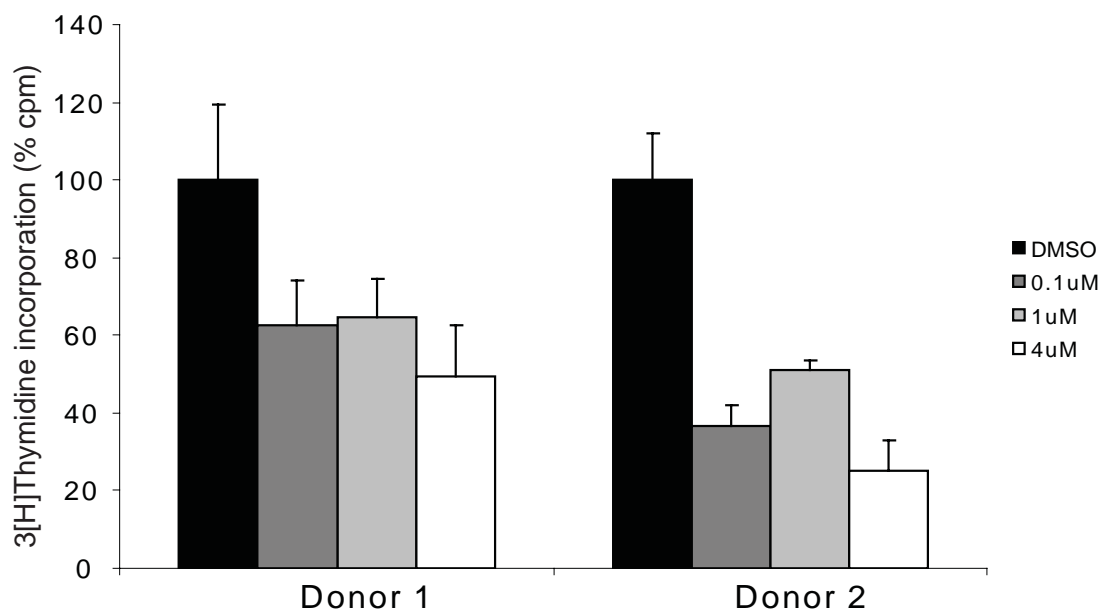

## C

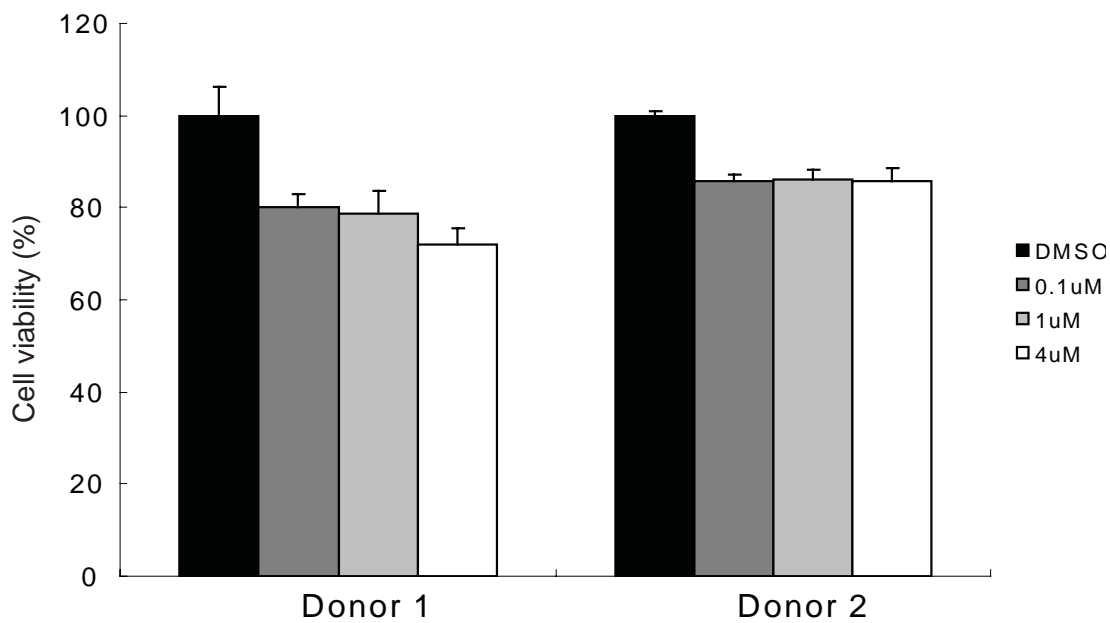

# Supplementary Figure 2

## A

### OPM1

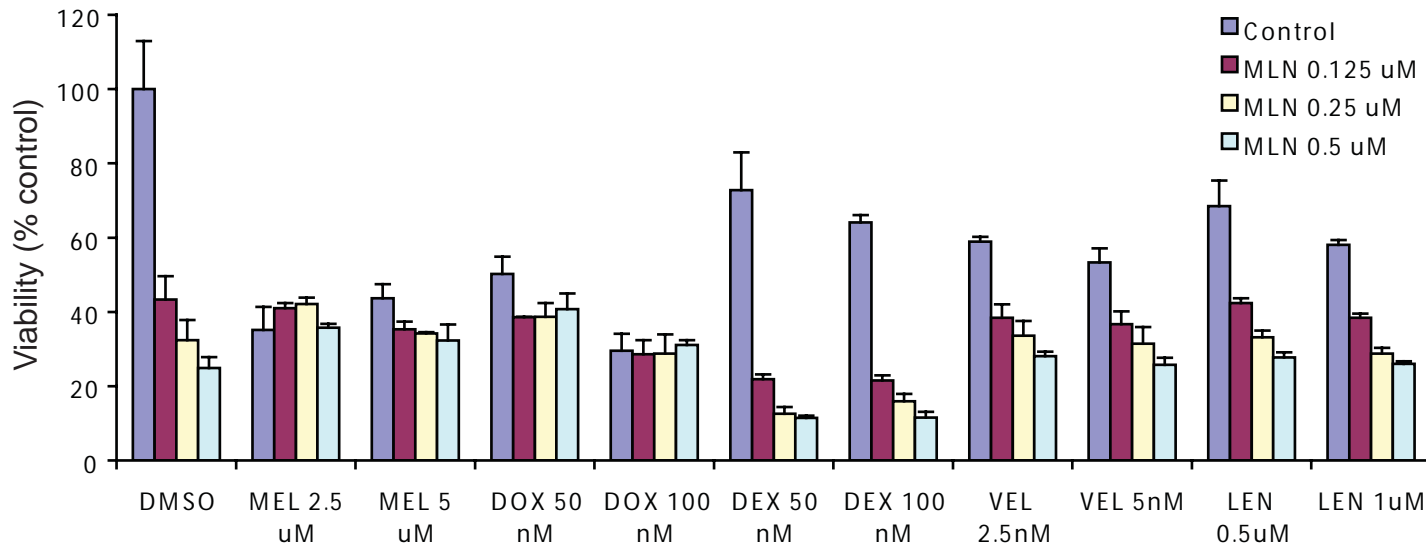

**B**

## Combination of MLN8237 and Dexamethasone

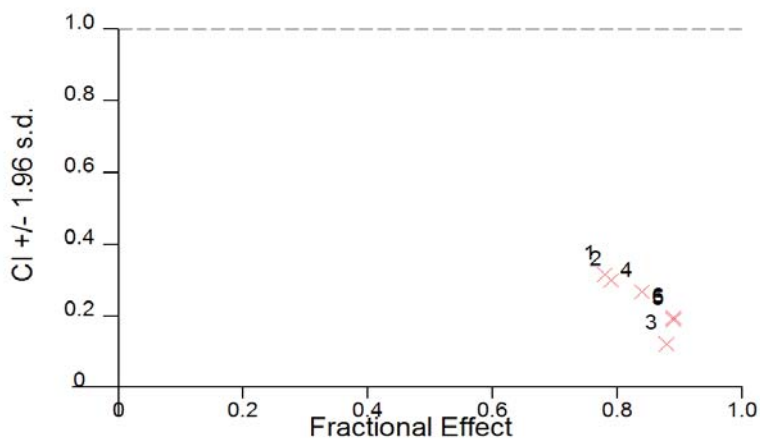

## Combination of MLN8237 and Doxorubicin

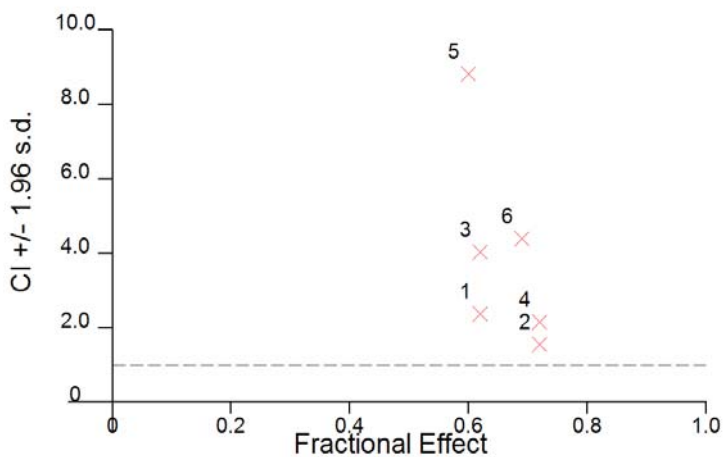**C**

## Combination of MLN8237 and Velcade

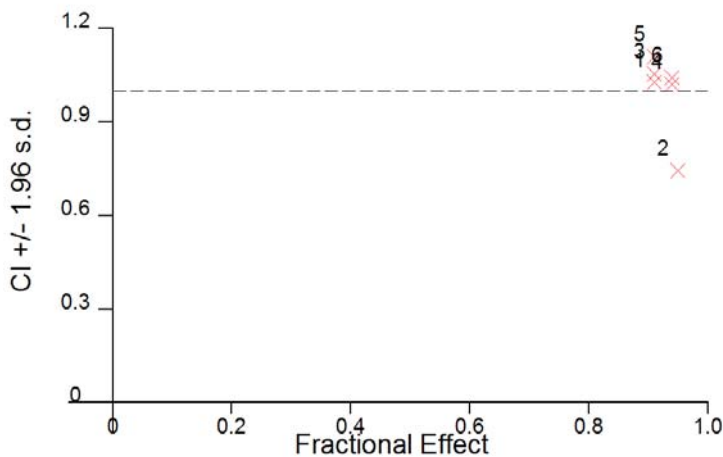

Supplement: blood-2009-12-259523_1.pdf [file blood-2009-12-259523_1.pdf]
